# Supplementary material
Source: PubMed Central journal article supplement (PMC2683709)
Supplement: emboj200962s1.pdf [file emboj200962s1.pdf]

X.laevis MRRSSVTN-----RQSLPLRVQDANRMCLTTPQNK--DROGFGLSM 41  
H.sapiens MKRSSVSSG-----GAGRLSMQELRSQDVNKQGLYTPQTK--EKPTFGKLSI 45  
S.cerevisiae MQSSSTSDQHVLLHHMDPHRFTSQIPATSSQLRRRNSTNOGLTDMINKSIARNITISGTGI 60  
S.pombe MQDSSSYARR-----YSQAPSSSNLRTTTFGFNGLGTSRTSLAPQRTLVNARQ 48  
C.elegans -----MFGDRRKTGGLNLNLRASIAIT--PTKRF TDYTG 32

X.laevis SKPHSGTSEKKTSTFFG-----KRASNGTARTSQYGAFGGTEKIKDPRPLH 86  
H.sapiens NKP---TSEKRVSLFG-----KRTSGHGSRNSQLGIFSSSEKIKDPRPLN 87  
S.cerevisiae PGGINKNKRTRSTVAGGTNGTALALNDKSNRNSVSRLSINQLGSLQQHLSNRDPRPLR 120  
S.pombe SIDPDGLSSRVLTPTMRPSLAPN-----TRSSVRVSNASFISQTPNITSIKDPRPLS 101  
C.elegans STSVRKTDAR-----PSLSQPRVSLFNTPKNSSVAPRD 69

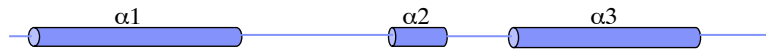

X.laevis DKAFIQQCIRQLCEFLNENGY---SQALTVKSLOQP-STKDFLKI FAFIYTFICPNYEN 142  
H.sapiens DKAFIQQCIRQLCEFLTENGY---AHNVSMKSLQAP-SVKDFLKI FTFLYGF LCP SYEL 143  
S.cerevisiae DKNFQSAIQEEIYDYLKKNKFDIETNHPI SIKFLKQP-TQKGFIIIFKWL YLR LDPGYGF 180  
S.pombe DRRYQQECATQVVNYLLESGF---SQPLGLNRRFMP-STREFAAIFKHL YNKLDPNFRF 157  
C.elegans VKSLVSLNGSKIYNFLVEYES---SDAPSEQLIMKPRGKNDFIACFELTYQHLSKDYEF 121

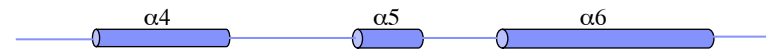

X.laevis PESK-FEEEI PRIFKELGY PFA--LSKSSMYTVGAPHTWPQIVAALVWVLDICVKLCCVLR 198  
H.sapiens PDKF-FEEEVPRIFKDLGY PFA--LSKSSMYTVGAPHTWPHIVAALVWVLDICIKIHTAMK 199  
S.cerevisiae TKS--IENEIYQILKNLRYPPLESINKSQISAVGGSN-WHKFLGMLHWMVVRTNIKLDMCL 237  
S.pombe GAR--YEEDVTCLKALNYPLDSISRSRLVAIGSPHVWPA ILLGMLHVVVSLIQCTEKAV 212  
C.elegans PRHERIEEVSQIFKGLGY PYP--LKNSSYYQPMGSSHGYPHLLDALSWLIDIIIRINSAVS 178

X.laevis SENPVFEDPPMGEQSENGIDF 219  
H.sapiens ESSPLFDDGQPWGEETEDGIM 220  
S.cerevisiae NKVDRSLINQNTQEI TILSQP 257  
S.pombe AMVYTVQNSLDDHLVDKVLV 235  
C.elegans EDTQNILFGDFMEQGAQEK 199

Figure S1
