# Supplementary material
Source: PubMed Central journal article supplement (PMC2683709)

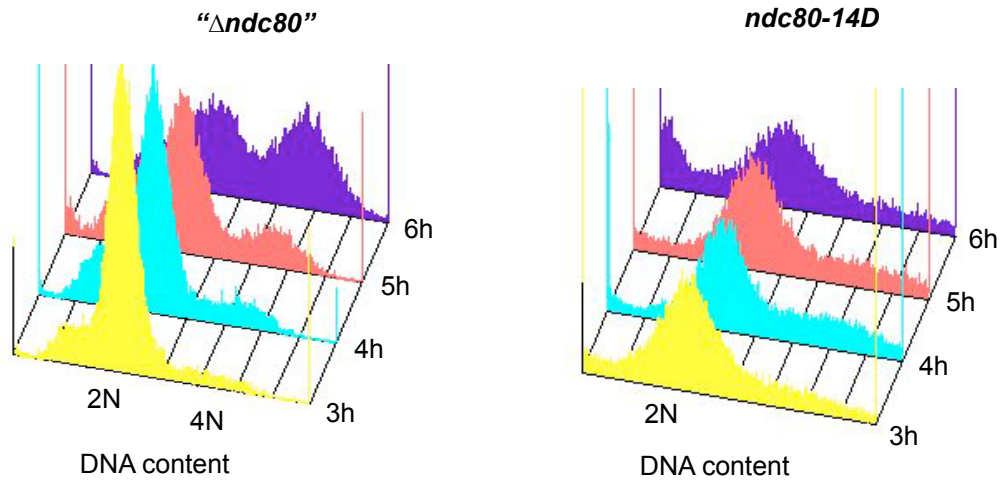

Figure S2

Supplement: emboj200962s2.pdf [file emboj200962s2.pdf]

*pGal1-3HA-MPS1*  
*pGal1-Ubi-R-NDC80*

---

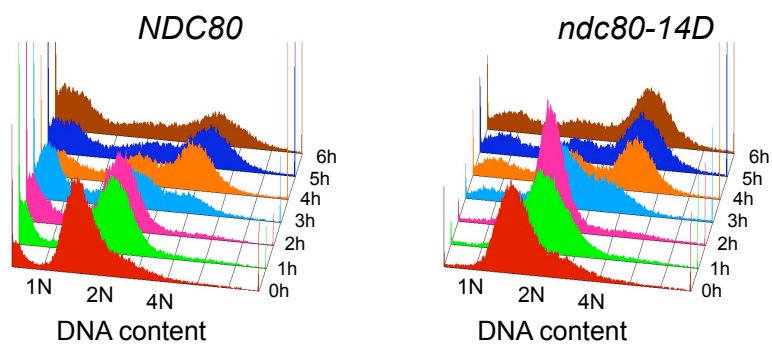

Figure S3

Supplement: emboj200962s3.pdf [file emboj200962s3.pdf]

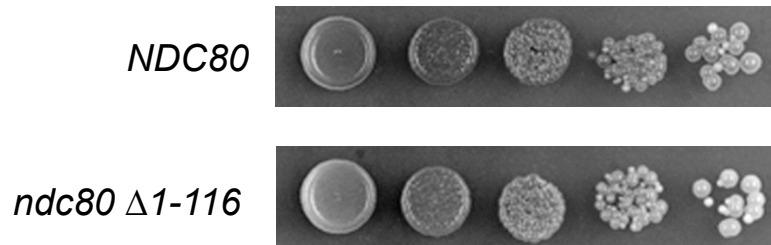

Figure S4

Supplement: emboj200962s4.pdf [file emboj200962s4.pdf]

SAC on → → → SAC off

A

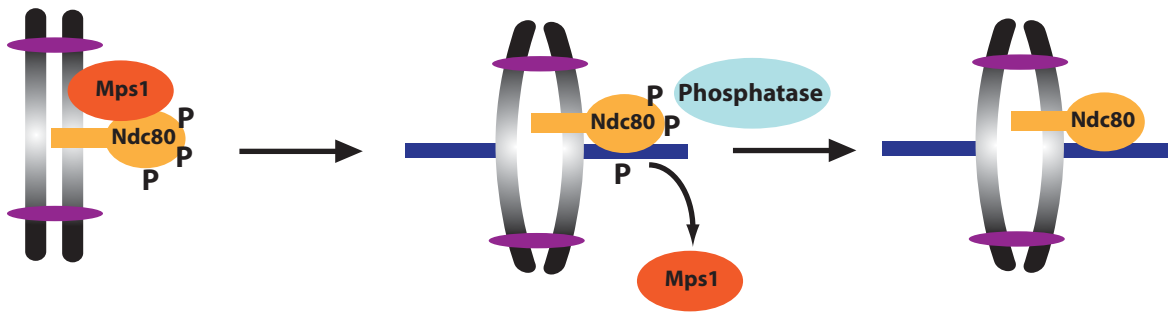

B

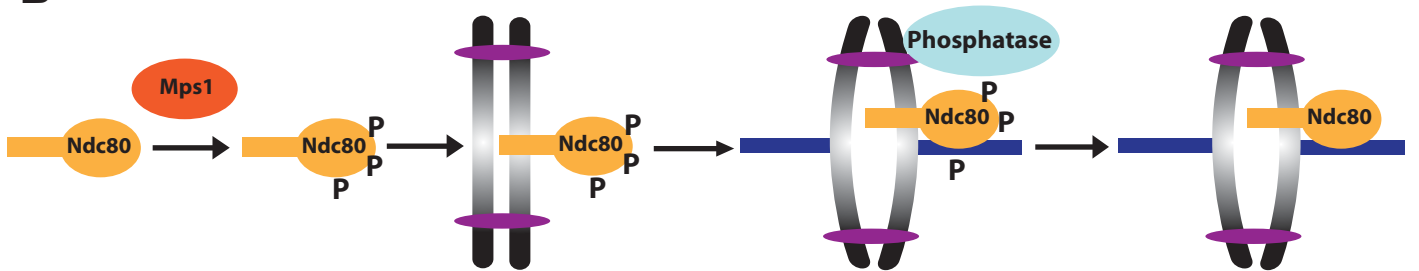

C

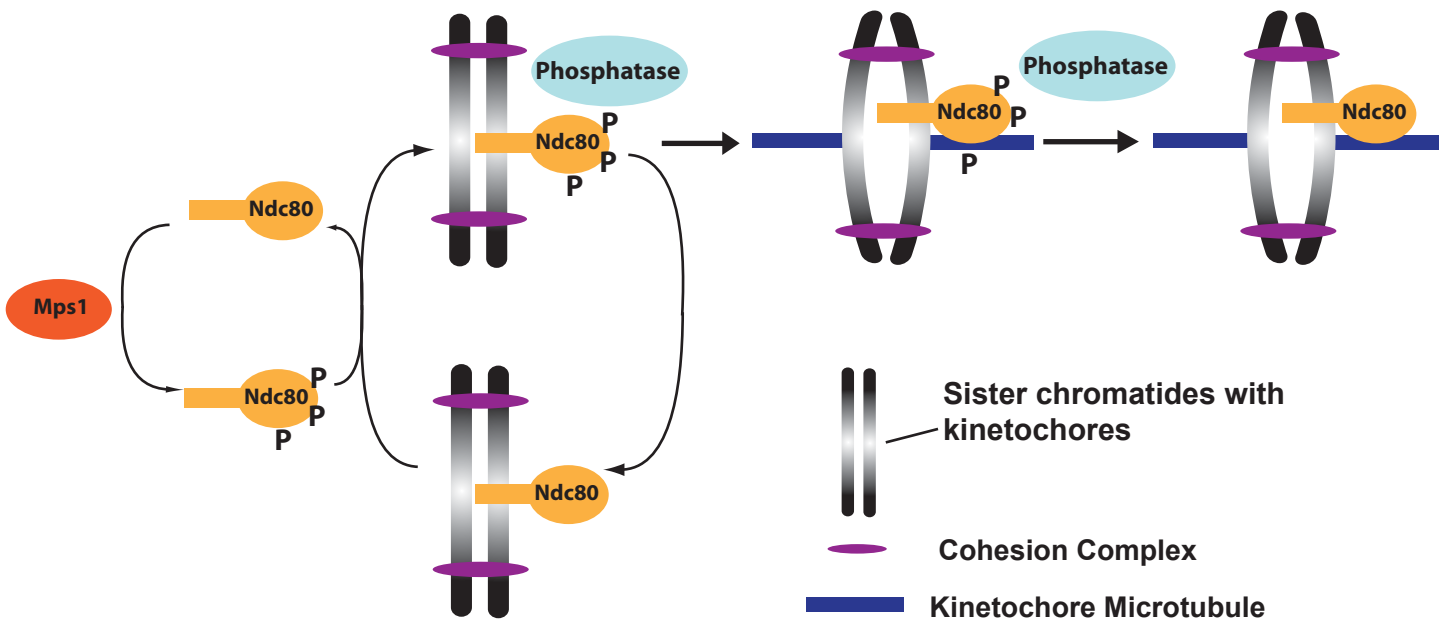

Figure S5

Supplement: emboj200962s5.pdf [file emboj200962s5.pdf]
